# Supplementary material
Source: Springer Nature journal article supplement (https://www.springermedizin.de/resource/supplementary/12958_2010_719_MOESM6_ESM.pdf/9568682)

**A)****1) DERL1**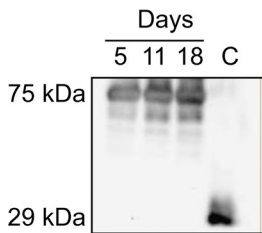**2) MHC I**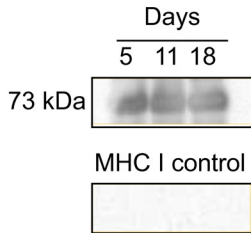**3) VIMP**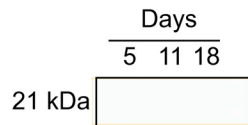**4) p97**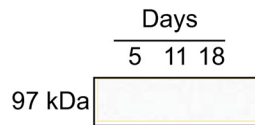**B)****1) MHC I**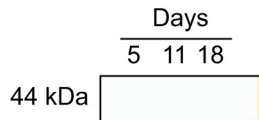**2) VIMP**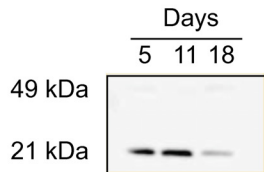**3) p97**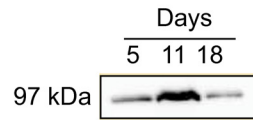

Supplement: MOESM6 [file 9568682]
